# Supplementary material for: Variants in EXOSC9 Disrupt the RNA Exosome and Result in Cerebellar Atrophy with Spinal Motor Neuronopathy
Source: PubMed Central journal article supplement (PMC5986733; doi:10.1016/j.ajhg.2018.03.011), 2018-05-03
Supplement: mmc1.pdf [file mmc1.pdf]

**Supplemental Data**

**Variants in *EXOSC9* Disrupt the RNA Exosome and Result  
in Cerebellar Atrophy with Spinal Motor Neuronopathy**

**David T. Burns, Sandra Donkervoort, Juliane S. Müller, Ellen Knierim, Diana Bharucha-Goebel, Eissa Ali Fageih, Stephanie K. Bell, Abdullah Y. AlFaifi, Dorota Monies, Francisca Millan, Kyle Retterer, Sarah Dyack, Sara MacKay, Susanne Morales-Gonzalez, Michele Giunta, Benjamin Munro, Gavin Hudson, Mena Scavina, Laura Baker, Tara C. Massini, Monkol Lek, Ying Hu, Daniel Ezzo, Fowzan S. AlKuraya, Peter B. Kang, Helen Griffin, A. Reghan Foley, Markus Schuelke, Rita Horvath, and Carsten G. Bönnemann**

Figure S1:

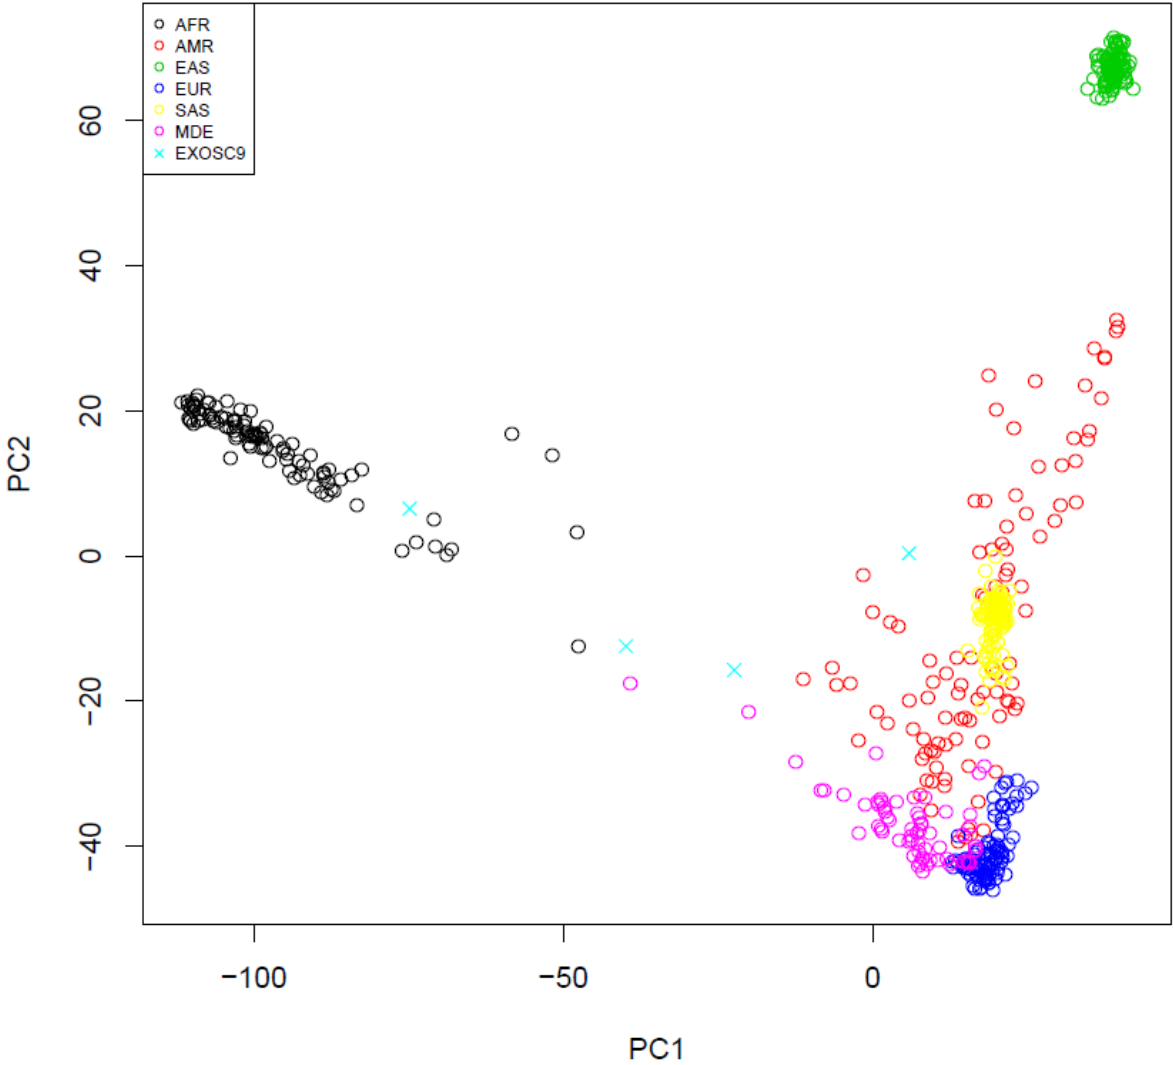

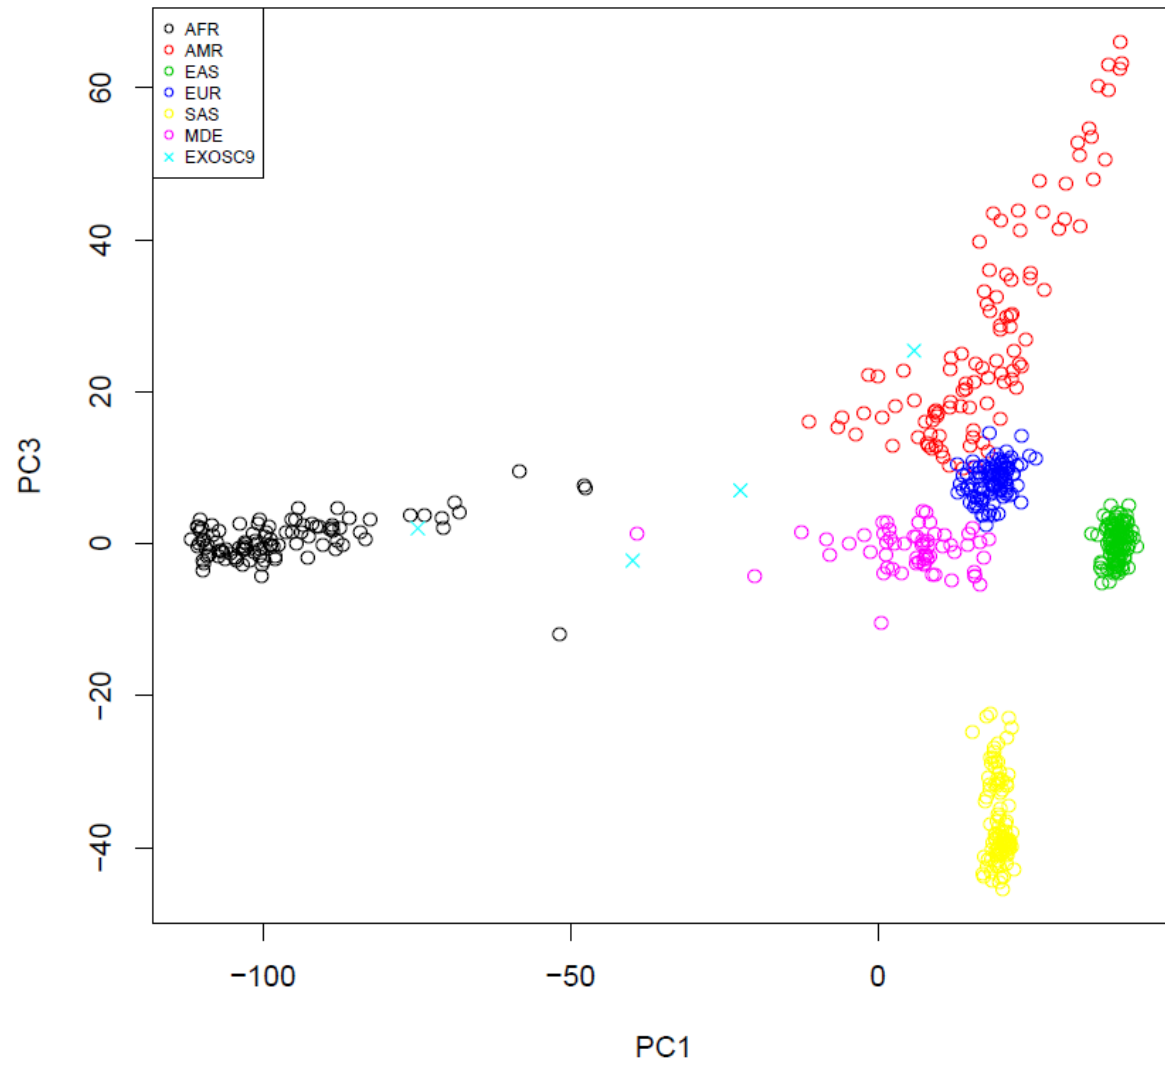

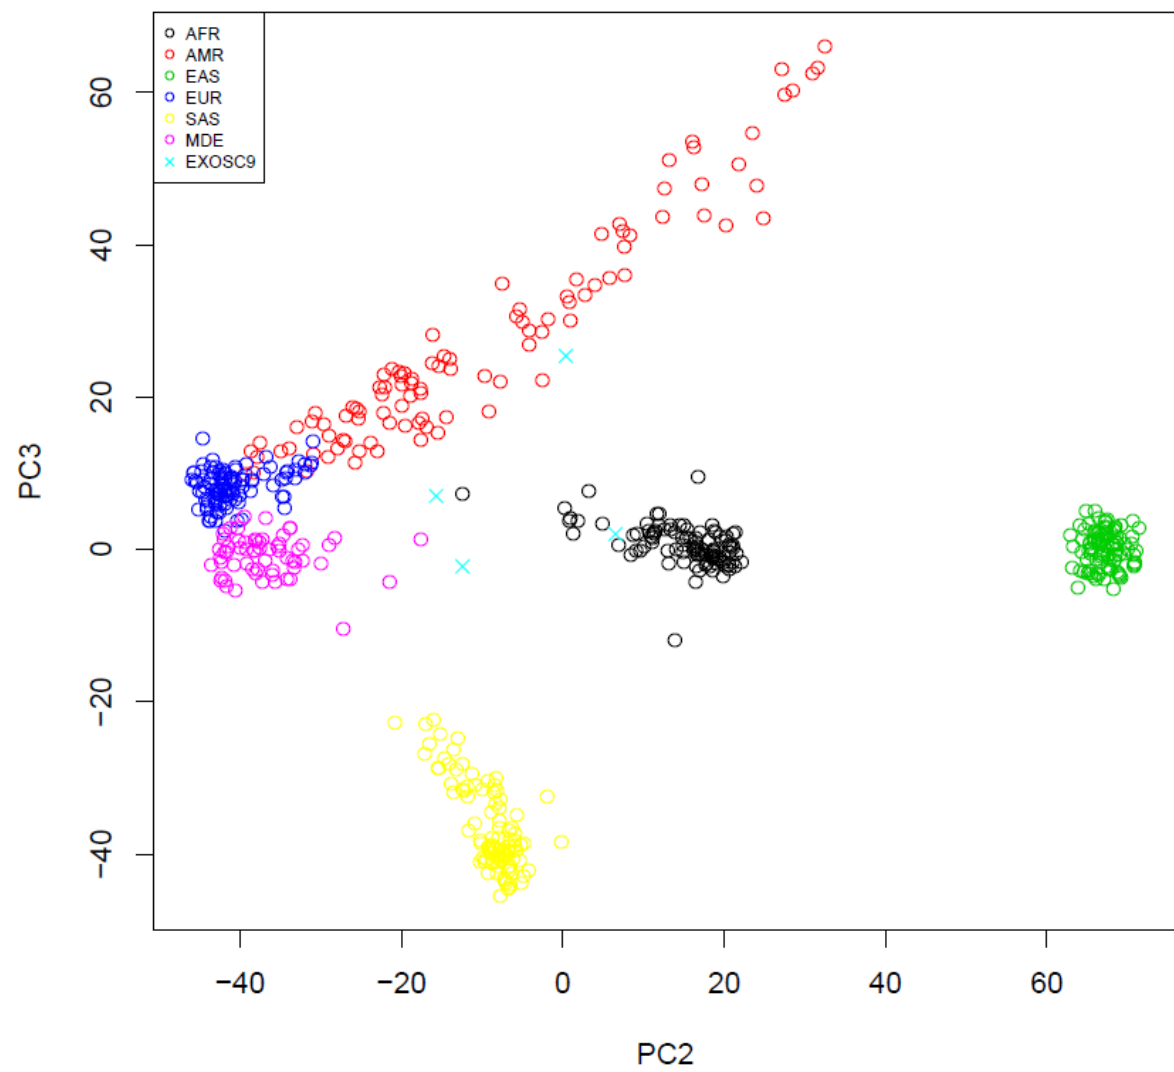

**Figure S1:** Principal Component Analysis of exome SNP genotypes compared against random representative samples from the 1000 Genomes Projects Phase 3 super-populations plus a GeneDx-sequenced Middle Eastern (MDE) population. Five total components were calculated (see Table) but only the three most informative components are shown.

**Table S1:**

| Primer name                 | Forward 3'-5'             | Reverse 3'-5'             |
|-----------------------------|---------------------------|---------------------------|
| ZF <i>exosc9</i> (IIE2 MO)  | CAAACCTGCGAGAGGCTTTTCC    | TCTCCTGAAACTACACAGAGAG    |
| ZF <i>exosc9</i> (E3 gRNA)  | TGAGTCAGGTATCCTGTGAGC     | TGCAAGAATGTTAACCTGTTTGGTT |
| pUC/M13                     | CGCCAGGGTTTTCCCAGTCACGAC  | TCACACAGGAAACAGCTATGAC    |
|                             |                           |                           |
|                             |                           |                           |
| Morpholino                  | Sequence                  |                           |
| ZF <i>exosc9</i> morpholino | GCGCTACAAAACGGTACACAGATAA |                           |
|                             |                           |                           |

**Table S1:** Primer sequences used in zebrafish

**Table S2:**

|  | Characteristics and Symptoms                                    | HPO ID     | Individual 1 | Individual 2                | Individual 3 | Individual 4               | Percentage |
|--|-----------------------------------------------------------------|------------|--------------|-----------------------------|--------------|----------------------------|------------|
|  | Mutation in EXOSC9                                              |            | homo c.41T>C | comp het c.41T>C   c.481C>T | homo c.41T>C | homo c.41T>C               |            |
|  | Effect on translation                                           |            | p.(Leu14Pro) | p.(Leu14Pro), p.(Arg161*)   | p.(Leu14Pro) | p.(Leu14Pro)               |            |
|  | Origin                                                          |            | El Salvador  | African-Canadian-Jamaican   | Saudi Arabia | African-European-Filippino |            |
|  | Gender                                                          |            | female       | male                        | female       | female                     |            |
|  | Age at onset                                                    |            | 8 mo         | birth                       | birth        | 2 weeks                    |            |
|  | Age at last assessment                                          |            | 28 mo        |                             | 4.5 y        | 19 mo                      |            |
|  | Age at death                                                    |            |              | 15 mo                       |              |                            |            |
|  | <b>Head</b>                                                     |            |              |                             |              |                            |            |
|  | Microcephalus                                                   | HP:0000252 |              |                             | +            |                            | 25         |
|  | Low-set ears                                                    | HP:0000369 |              | +                           |              |                            | 25         |
|  | Short neck                                                      | HP:0000470 |              | +                           |              |                            | 25         |
|  | Blue sclerae                                                    | HP:0000592 |              | +                           |              |                            | 25         |
|  | Prominent epicanthic folds                                      | HP:0007930 |              | +                           |              |                            | 25         |
|  | Hypertelorism                                                   | HP:0000316 |              | +                           |              |                            | 25         |
|  | <b>Respiratory and chest</b>                                    |            |              |                             |              |                            |            |
|  | Recurrent infections                                            | HP:0002719 | +            |                             |              |                            | 25         |
|  | Respiratory failure in infancy                                  | HP:0002878 | +            | +                           |              |                            | 50         |
|  | <b>Abdomen</b>                                                  |            |              |                             |              |                            |            |
|  | Gastrostomy tube feeding in infancy                             | HP:0011471 | +            | +                           |              |                            | 50         |
|  | Gastroesophageal reflux                                         | HP:0002020 | +            |                             |              |                            | 25         |
|  | Feeding difficulties in infancy                                 | HP:0008872 |              |                             | +            |                            | 25         |
|  | <b>Skeletal</b>                                                 |            |              |                             |              |                            |            |
|  | Arthrogryposis multiplex congenital                             | HP:0002804 | +            | +                           |              |                            | 50         |
|  | Congenital fractures                                            | HP:0005855 |              | +                           |              |                            | 25         |
|  | <b>Neurologic</b>                                               |            |              |                             |              |                            |            |
|  | Severe muscular hypotonia                                       | HP:0006829 | +            | +                           | +            | +                          | 100        |
|  | Seizures                                                        | HP:0001250 |              |                             | +            |                            | 25         |
|  | Type I muscle fiber predominance                                | HP:0003803 | +            | +                           |              | +                          | 75         |
|  | Poor head control                                               | HP:0002421 | +            |                             |              | +                          | 50         |
|  | Failure to thrive                                               | HP:0001508 |              | +                           |              |                            | 25         |
|  | Generalized muscle weakness                                     | HP:0003324 | +            |                             | +            | +                          | 75         |
|  | Nystagmus                                                       | HP:0000639 | +            |                             |              | +                          | 50         |
|  | Cerebellar atrophy                                              | HP:0001272 | +            | +                           |              | +                          | 75         |
|  | Vermis atrophy                                                  | HP:0001284 | +            |                             |              |                            | 25         |
|  | Cerebral atrophy                                                | HP:0002059 |              | +                           | +            |                            | 50         |
|  | Areflexia                                                       | HP:0001284 | +            |                             |              |                            | 25         |
|  | Increased muscle reflexes                                       | HP:0001347 |              |                             | +            |                            | 25         |
|  | EMG: neuropathic changes                                        | HP:0003445 | +            |                             |              | +                          | 50         |
|  | Muscle / tongue fasciculations                                  | HP:0002380 | +            |                             |              |                            | 25         |
|  | Delayed gross motor development                                 | HP:0002194 | +            | +                           | +            | +                          | 100        |
|  | Weak voice                                                      | HP:0001621 | +            |                             | +            | +                          | 75         |
|  | <b>Prenatal manifestation</b>                                   |            |              |                             |              |                            |            |
|  | Decreased fetal movements                                       | HP:0001558 | +            | +                           |              |                            | 30         |
|  | Oligohydramnios                                                 | HP:0001562 |              | +                           |              |                            | 25         |
|  | Intrauterine growth retardation (< 10 <sup>th</sup> percentile) | HP:0001511 |              | +                           |              |                            | 25         |

**Table S2:** HPO coding of phenotypes due to mutations in *EXOSC9*

**Table S3:**

| Sample              | knn.pred | PC1               | PC2               | PC3               | PC4               | PC5              |
|---------------------|----------|-------------------|-------------------|-------------------|-------------------|------------------|
| <b>Individual 1</b> | AMR      | 5.86084161991711  | 0.381779639737347 | 25.4032514365166  | -21.0875664424482 | 18.6590532074565 |
| <b>Individual 2</b> | AMR      | -22.3702289478425 | -15.7062479478535 | 7.02632626688231  | 13.8203817951703  | 34.1568567434397 |
| <b>Individual 3</b> | AFR      | -39.8713917778595 | -12.421418841825  | -2.22439179095596 | 17.719501768131   | 39.8300579056514 |
| <b>Individual 4</b> | AFR      | -74.7967964546837 | 6.5332515180803   | 2.02902721367773  | 3.38496964411094  | 3.05927032223124 |

**Table S3:** Principal Component Analysis of exome SNP genotypes compared against random representative samples from the 1000 Genomes Projects Phase 3 major populations plus a GeneDx-sequenced Middle Eastern (MDE) population. Components are numbered in the order of informativeness and knn.pred is the nearest-neighbor-predicted population.
